# Supplementary material
Source: publisher site journal article supplement (https://www.dovepress.com/article/245941)
Supplement: Supplementary file 1 [file get_supplementary_file.php]

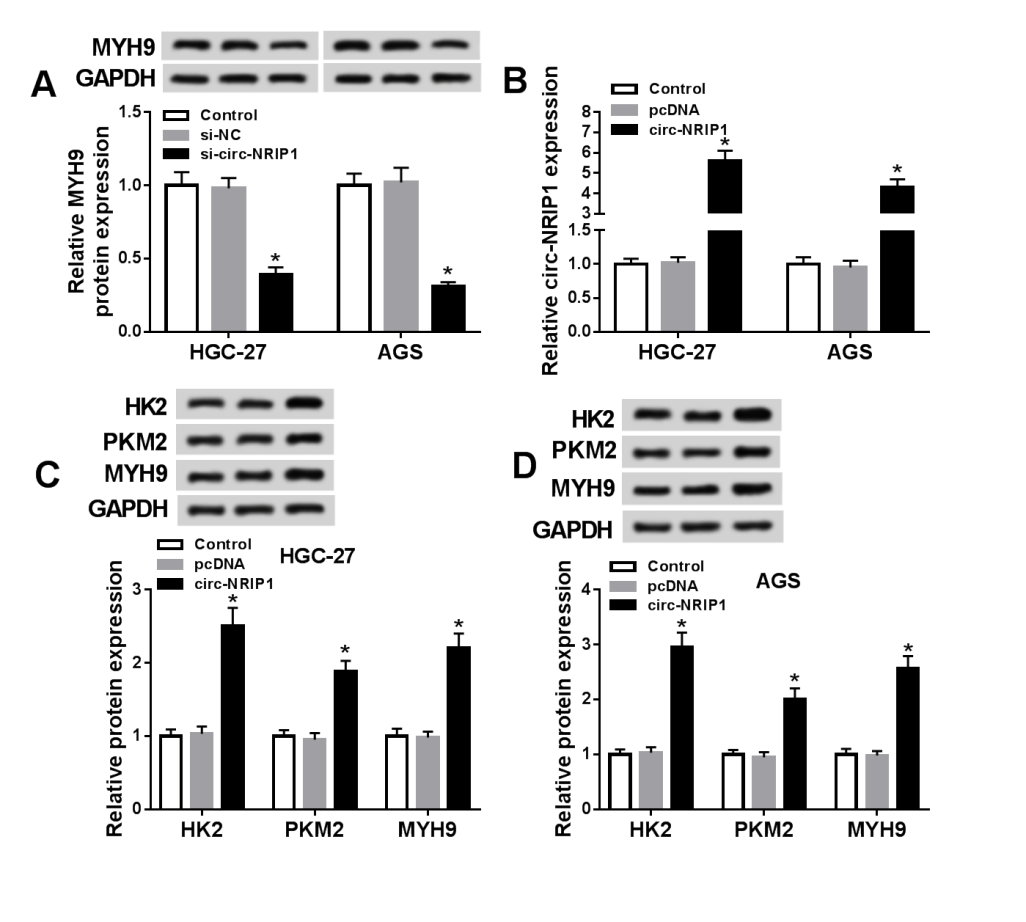


**Fig. S1 Overexpressionof circ-NRIP1 boosted the protein levels of MYH9, HK2 and PKM2 in GC cells. (A)** MYH9 protein level was detected in HGC-27 and AGS cells transfected with Control, si-NC and si-circ-NRIP1. **(B)** Circ-NRIP1 level was measured in HGC-27 and AGS cells transfected with Control, pcDNA and circ-NRIP1. **(C and D)** Protein levels of MYH9, HK2 and PKM2 were assessed in transfected HGC-27 and AGS cells.**P*<0.05.
